# Supplementary material for: Acridine Based Small Molecular Hole Transport Type Materials for Phosphorescent OLED Application
Source: MDPI journal article supplement (doi:10.3390/molecules26247680), 2021-12-19
Supplement: s1 [file s1]

# Acridine Based Small Molecular Hole Transport Type Materials for Phosphorescent OLED Application

Ramanaskanda Braveenth <sup>1</sup>, Keunhwa Kim <sup>1</sup>, Il-Ji Bae <sup>2</sup>, Kanthasamy Raagulan <sup>1</sup>, Bo Mi Kim <sup>3</sup>,  
Miyoung Kim <sup>2,\*</sup>  
and Kyu Yun Chai <sup>1,\*</sup>

<sup>1</sup> Division of Bio-Nanochemistry, College of Natural Sciences, Wonkwang University, Iksan City, Chonbuk 570-749, Korea; braveenth.czbt@gmail.com (R.B.); qeutesl@naver.com (K.K.); raagulan@live.com (K.R.)

<sup>2</sup> Nano-Convergence Research Center, Korea Electronics Technology Institute, Jeonju 54853, Korea; ijbae@keti.re.kr

<sup>3</sup> Department of Chemical Engineering, Wonkwang University, Iksan City, Chonbuk 570-749, Korea; 123456@wku.ac.kr

\* Correspondence: miy1kim@keti.re.kr (M.K.); geuyoon@wonkwang.ac.kr (K.Y.C.);  
Tel.: +82-632-190-011 (M.K.); +82-638-506-230 (K.Y.C.)

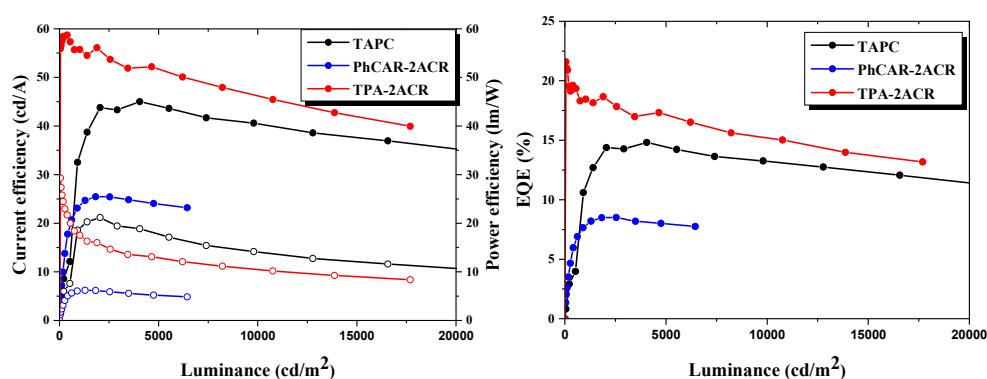

**Figure S1.** Luminescence-current and power efficiency, and luminance vs external quantum efficiencies of yellow phosphorescent OLEDs with TAPC, PhCAR-2ACR and TPA-2ACR as hole transporting materials (HTMs).

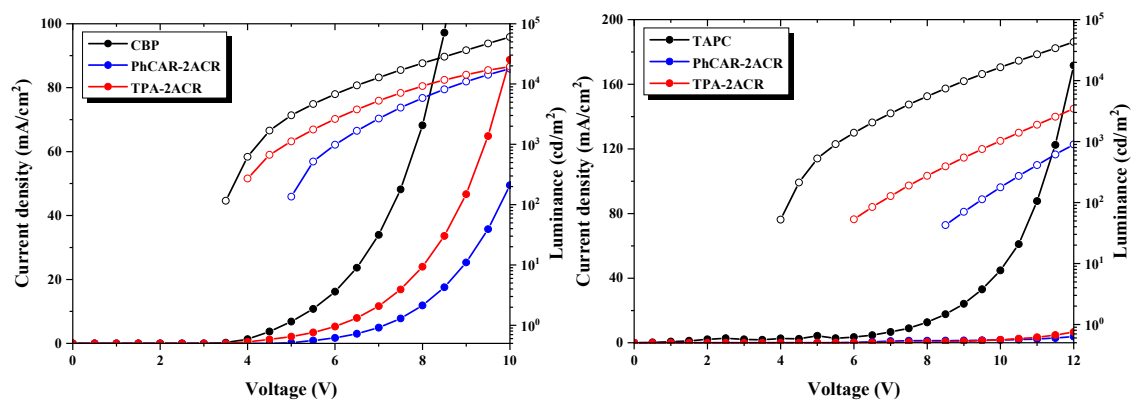

**Figure S2.** Luminescence-current density vs voltage of host and HTL based yellow phosphorescent OLEDs devices (TAPC, PhCAR-2ACR and TPA-2ACR).

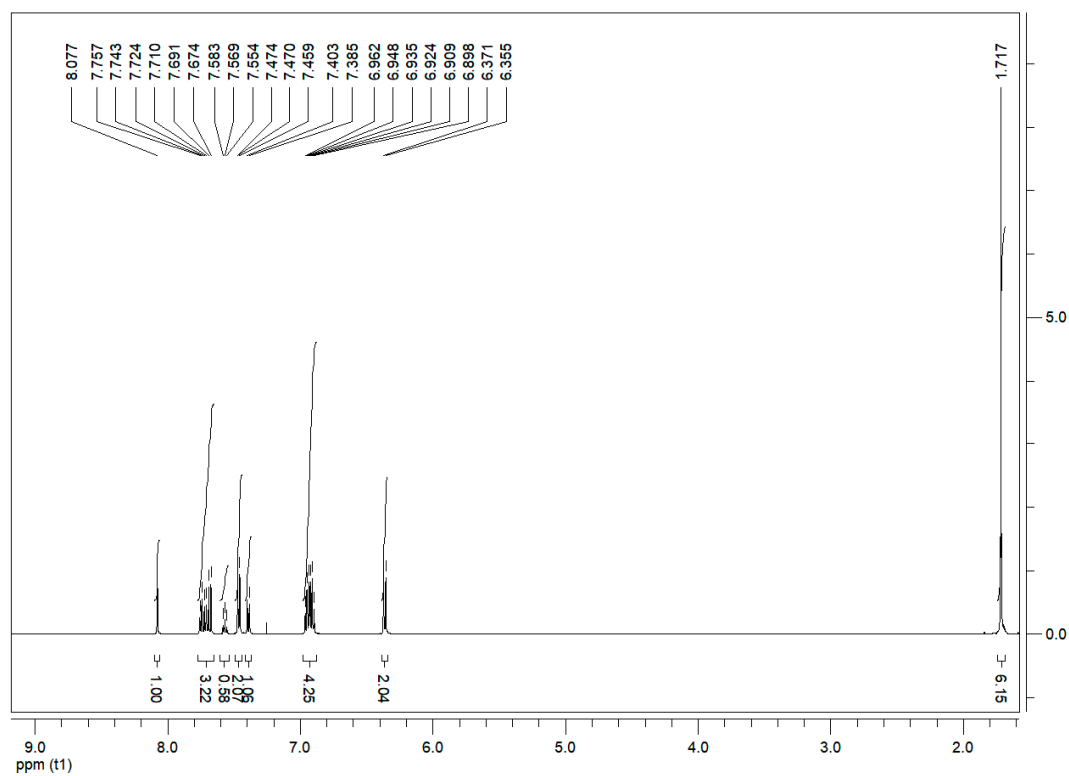

**Figure S3.** Proton NMR of PhCAR-2ACR.

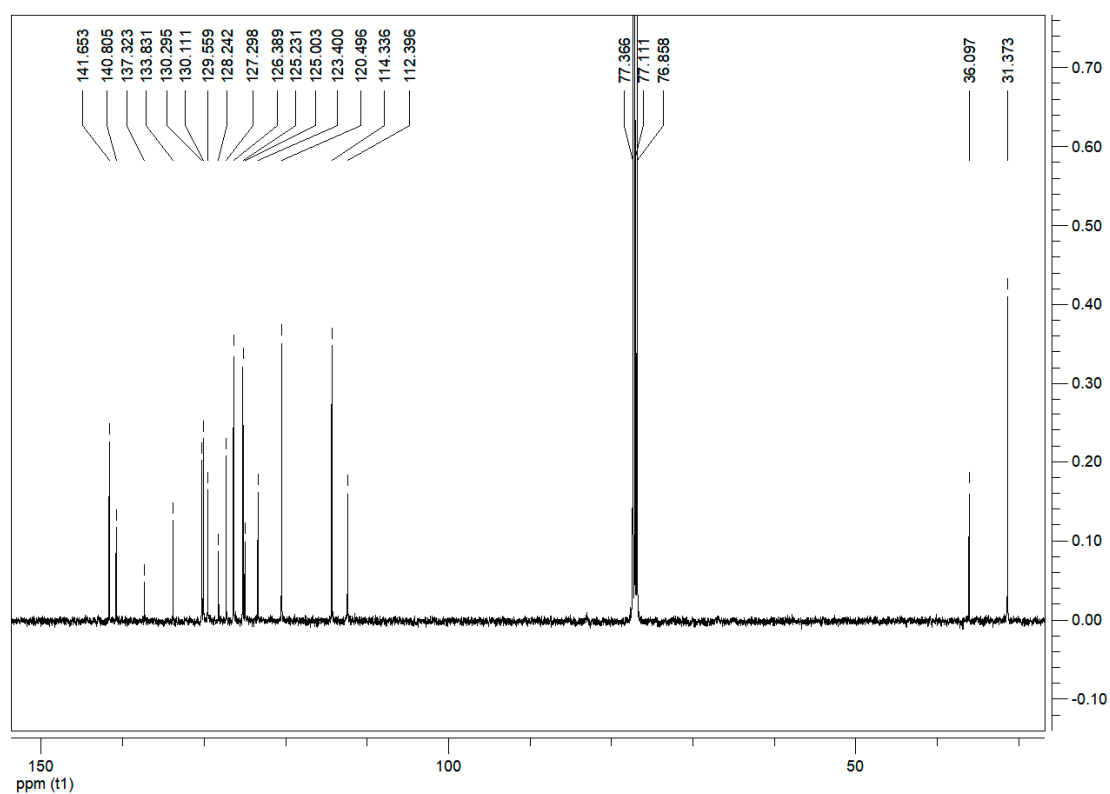

**Figure S4. Carbon NMR of PhCAR-2ACR.**

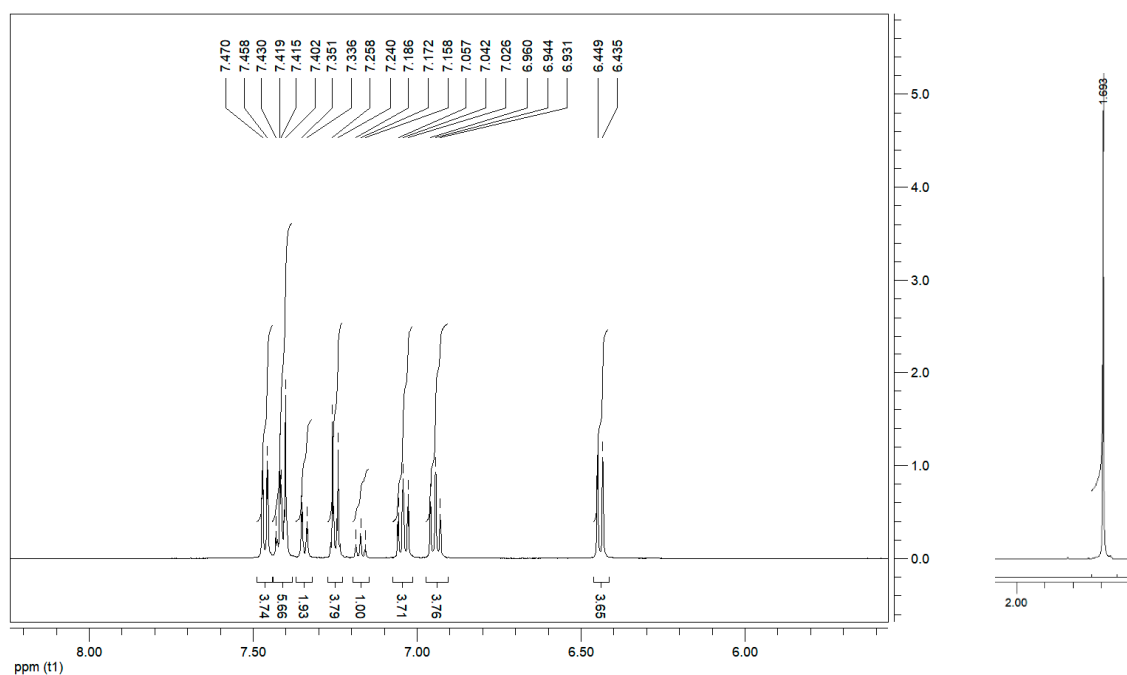

**Figure S5. Proton NMR of TPA-2ACR.**

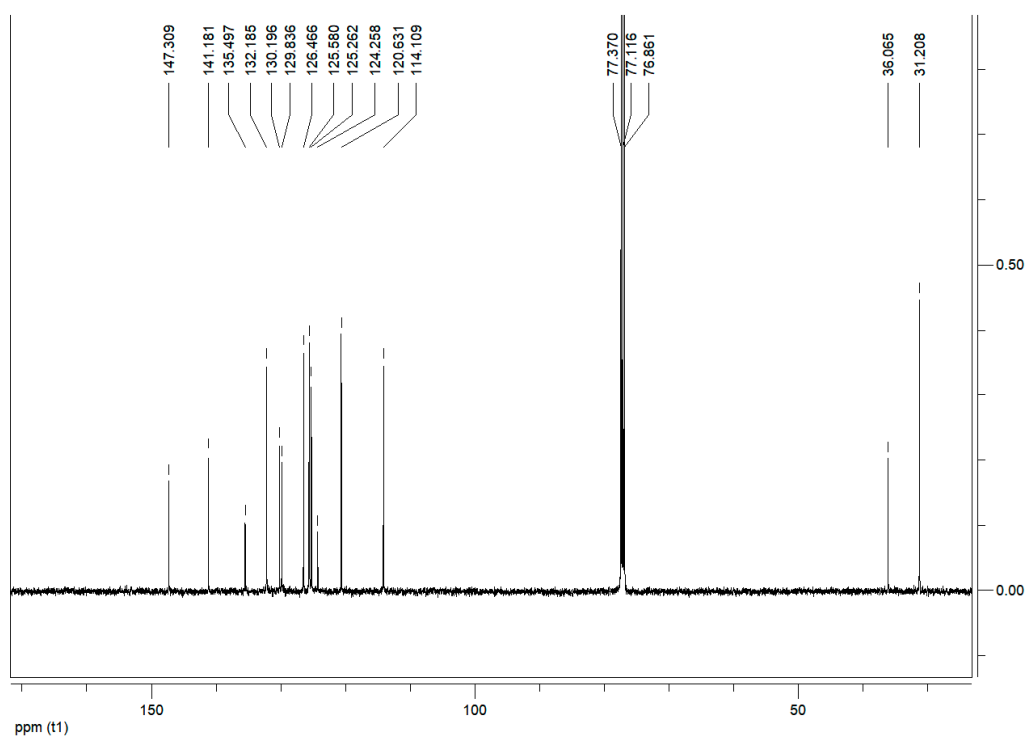

**Figure S6.** Carbon NMR of TPA-2ACR.
